# Supplementary material
Source: ML conference proceedings conference paper supplement (https://openreview.net/forum?id=o5U7hM8T95)
Supplement: supplementary_material [file attachment]

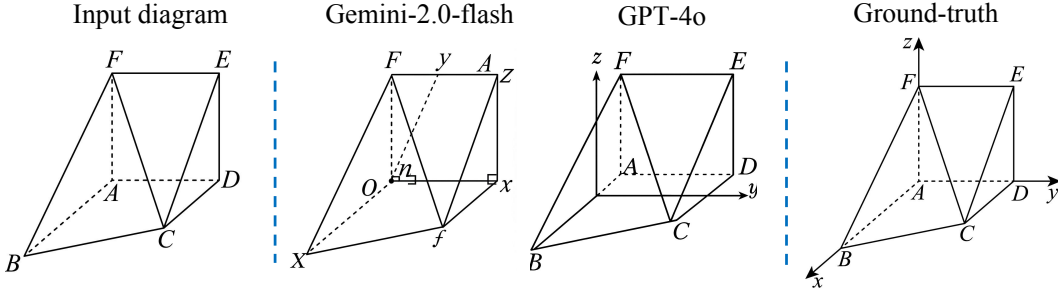

**[Auxiliary Line Construction]** Take A as the origin, and let the lines along AB, AD, and AF be the x-axis, y-axis, and z-axis, respectively, then establish the three-dimensional Cartesian coordinate system A-xyz.

Figure 5: Comparison of two representative image editing models for constructing a three-dimensional Cartesian coordinate system.

## A THE USE OF LARGE LANGUAGE MODELS

In this paper, the authors used ChatGPT solely for language polishing, including grammar, phrasing, and stylistic refinement. We did not use it to generate scientific content, such as research ideas, methods, or related work. We did not provide any confidential, personal, or proprietary data to the model. The authors take full responsibility for all scientific content, which was exclusively written and verified by us.

## B LIMITATION AND FUTURE WORK

Although our framework achieves competitive performance, it does not yet realize the ideal approach of directly rendering precise auxiliary lines on the diagram. Given the limited geometric controllability of current image editing and diffusion models, we instead employ a cross-modal reward model as a practical proxy to promote diagram-text consistency without directly editing the diagram images. In future work, we will investigate constraint-guided diffusion in conjunction with a geometry-constrained rendering engine to explicitly render auxiliary lines, thereby enhancing the alignment between visual constructions and symbolic reasoning.

## C QUALITATIVE COMPARISON OF IMAGE EDITING MODELS FOR AUXILIARY-LINE GENERATION

To further highlight the limitations of current image-editing models in precise geometric construction, we present a single illustrative example comparing two representative models on a three-dimensional coordinate system construction task. As shown in Figure 5, this comparative example reveals a persistent difficulty in faithfully instantiating the specified auxiliary line descriptions, namely, aligning the edits with the intended spatial constraints, which motivates our text-driven auxiliary line construction guided by a cross-modal reward model.

## D DATA CREATION

In this section, we detail the four progressive steps of our data creation pipeline.

### D.1 AUTOMATED PROBLEM IDENTIFICATION

To construct the AuxSolidMath dataset, we first collect over 350 sets of high school geometry problems from publicly available online sources. Given that the dataset is intended to support constructive geometric reasoning, we specifically target problems that necessitate auxiliary line constructions as integral components of their solutions.

To efficiently identify such problems, we design an automated two-stage filtering pipeline using Python scripts. In the first stage, we detect problems whose solutions contain explicit mentions of auxiliary-line constructions. Specifically, we apply regular expression patterns to locate question number markers that are explicitly present in the exam papers and use these markers to segment the content into individual problem units. For each problem, we examine the solution for verbs that signal the introduction of auxiliary lines (e.g., "connect," "construct," "draw," "establish"). Problems lacking such terms are discarded, while those containing relevant cues are retained. In the second stage, we further refine the selection by ensuring that each retained problem contains both the original diagram and an auxiliary-line diagram. To this end, we quantify the number of diagrams associated with each problem. Problems with fewer than two diagrams are excluded, whereas those with at least two, which usually represent the original and modified diagrams, are preserved. This automated pipeline enables scalable and consistent filtering of auxiliary-line geometry problems, significantly reducing manual annotation effort.

## D.2 AUTOMATED DEDUPLICATION AND DIAGRAM EXTRACTION

Upon identifying geometry problems requiring auxiliary lines, we employ an automated pipeline to deduplicate instances and extract the associated diagrams. This step guarantees the uniqueness and visual quality of data instances for downstream model training.

**Problem Deduplication.** To eliminate duplicate problems, we retain only the first occurrence of each unique problem based on its textual content. Concretely, we initialize a global problem set as an empty collection. We then sequentially process all Word-formatted exam papers, examining only the problem descriptions while ignoring the associated solutions and diagrams. For each problem, if its description is not already present in the global set, we add the problem; otherwise, we discard it as a duplicate. This procedure ensures that identical problems, which often recur across different examinations, are retained only once.

**Diagram Extraction.** Following deduplication, we extract, filter, and store the geometric diagrams associated with each retained problem. A key challenge lies in reliably distinguishing true geometric figures from image-embedded mathematical expressions (e.g., MathType equations), as both appear in Word exam papers. Existing Python libraries are unable to make this distinction accurately, often misclassifying equations as diagrams and introducing significant noise into the extraction process. To overcome this limitation, we innovatively integrate the Apache POI library through a custom Java implementation, enabling fine-grained control over the parsing of Word documents. This setup enables reliable identification and extraction of genuine geometric diagrams while effectively filtering out formula-rendered images. To further ensure visual quality, the extracted diagrams are then processed using OpenCV to discard low-resolution or unclear diagrams. The remaining diagrams are subsequently saved using a standardized naming convention that distinguishes between the original and the annotated versions of the auxiliary lines. To be more specific, for each problem indexed by  $i$ , we store two images:  $\{i\}.png$ , which contains the original diagram, and  $\{i\}_{auxiliary}.png$ , which includes the corresponding auxiliary-line diagram. This consistent format facilitates downstream alignment between textual and visual modalities within the multimodal processing pipeline.

## D.3 STRUCTURED DATA EXTRACTION

Building on the high-quality geometric diagrams obtained in the previous step, we proceed to extract the corresponding textual content for each geometry instance, including the problem description, the final answer, and the auxiliary-line description. This extraction process is non-trivial, as the original Word documents frequently embed mathematical expressions using MathType formats that are not reliably handled by standard document parsing tools.

To address this challenge, we render the processed Word documents as images, thereby enabling LVLMS to leverage their visual reasoning capabilities. Although this approach appears straightforward, open-source models such as Qwen2.5-VL-7B-Instruct (Bai et al., 2025) often struggle to accurately parse complex geometry problems involving symbolic notation and mathematical expressions. In contrast, closed-source models like GPT-4o (Hurst et al., 2024) exhibit significantly stronger performance, but their reliance on commercial APIs introduces substantial costs and limits scalability in large-scale applications. To balance accuracy with scalability, we adopt a hybrid strategy. More concretely, we first utilize an advanced closed-source model (*i.e.*, GPT-4o) to gen-

erate a small, high-quality seed dataset comprising 300 manually verified instances. This curated dataset is then used to fine-tune an open-source LVLM (*i.e.*, Qwen2.5-VL-7B-Instruct), resulting in a lightweight, domain-adapted model capable of accurate and scalable text extraction. The final output consists of the extracted problem description, the final answer, and the auxiliary-line description, all encapsulated in a structured JSON format. This unified representation facilitates consistent data handling and serves as a foundation for training a robust open-source text extraction model. By releasing this model, we aim to contribute a practical and reusable resource to the broader research community working on geometry-aware vision-language understanding.

#### D.4 MANUAL VERIFICATION

To ensure the quality and reliability of the final dataset, we perform a manual verification step that assesses each data instance in terms of accuracy, completeness, uniqueness, and semantic consistency, alongside visual quality criteria such as image clarity and resolution. Two AI researchers serve as independent checkers. Each instance is independently reviewed by both researchers. If either checker identifies a potential issue, the instance is collaboratively revised. This process is repeated up to three times per instance, ensuring that all errors, including subtle or ambiguous ones, are systematically identified and corrected. Manual verification plays a critical role in resolving complex symbolic expressions and ambiguous diagrammatic content that automated tools may misinterpret. Despite its relatively low cost and effort, this step remains indispensable for ensuring the high data fidelity necessary for a reliable model.

### E EXPERIMENTAL SETUP

#### E.1 MODELS

On the closed-source models, we include leading models such as gpt-5-mini (OpenAI, 2025), o4-mini (OpenAI, 2025) and GPT-4o (Hurst et al., 2024), Gemini-2.0-Flash and Gemini-2.5-Flash (DeepMind, 2025a), Claude 3.7 Sonnet (Anthropic, 2025a) and Claude Sonnet 4 20250514 (Anthropic, 2025b). These models represent the forefront of multimodal reasoning among closed-source models, although their internal architectures remain undisclosed. On the open-source models, we consider several publicly available high-performance models, including the Qwen2 VL (Wang et al., 2024b) and Qwen2.5 VL series (Bai et al., 2025), InternVL 3 families (Zhu et al., 2025), LLaMA-3.2-11B-Vision-Instruct (Meta, 2024) and Llama-4-Scout-17B-16E-Instruct (Meta, 2025). These models encompass a range of design paradigms, parameter scales, and instruction tuning strategies, providing a robust comparative foundation for evaluating multimodal reasoning capabilities. Note that models such as Gemini-2.5 Pro (DeepMind, 2025b) and OpenAI o3 (OpenAI, 2025) are excluded from our study due to limited accessibility and high inference costs.

#### E.2 TRAINING IMPLEMENTATION DETAILS

We adopt a two-stage training paradigm based on the Qwen2.5-VL series, including Qwen2.5-VL-3B and Qwen2.5-VL-7B, consisting of the SFT stage and the RL stage.

**SFT Stage.** The SFT phase is conducted using the LLaMA-Factory framework (Zheng et al., 2024). For Qwen2.5-VL-7B, we train the model for 5 epochs with a per-device batch size of 2 and a gradient accumulation step of 8 (effective batch size of 16). We use the AdamW optimizer with a learning rate of  $2e-5$  and apply a cosine learning rate scheduler with a warmup ratio of 0.1. The model is trained in bf16 precision. Vision and projection modules are frozen during this stage, while the language model remains unfrozen. For Qwen2.5-VL-3B, we adopt the same training configuration as the 7B variant, except learning rate and training epochs. Specifically, Qwen2.5-VL-3B is trained for 5 epochs with a learning rate of  $3e-5$ .

**RL Stage.** The RL phase is performed using the EasyR1 framework (Zheng et al., 2025) with the GRPO algorithm. For the Qwen2.5-VL-7B model, training and validation data are loaded from Parquet files containing question-diagram pairs, with a maximum response length of 8192. Both rollout and validation batch size are set to 16. The actor is optimized using AdamW (learning rate  $2e-6$ , weight decay  $1e-2$ , no warmup). KL regularization is applied using the `low_var_kl`

penalty with a coefficient of  $1e-2$ . Training runs for 6 epochs using bf16 precision, with gradient checkpointing and partial FSDP offloading enabled for memory efficiency.

*Rewards.* The overall reward is the sum of a cross-modal auxiliary-line consistency reward and a final-answer accuracy reward, where the auxiliary-line component is weighted by  $\alpha = 0.1$ . For Qwen2.5-VL-3B, we adopt the same RL configuration as the 7B model, with adjustments to the batch size and the number of training epochs. Specifically, Qwen2.5-VL-3B is trained for 4 epochs with a batch size of 8.

All training was conducted on a server equipped with two NVIDIA A100 80GB and two NVIDIA A800 80GB GPUs. The SFT stage was performed on the A100 GPUs, while the full set of four GPUs was utilized during the reinforcement learning stage.

## F RELATED WORK

In this section, we also review benchmarks and datasets for geometric reasoning. Most benchmarks and datasets for geometric problem solving focus on plane geometry, where diagrams and problems involve two-dimensional figures. Well-known resources in this area include Geometry3K (Lu et al., 2021), GeoQA (Chen et al., 2021a), UniGeo (Chen et al., 2022), and GeomRel (Wang et al., 2025b), which primarily cover plane geometry problems. A concurrent benchmark, GeoLaux (Fu et al., 2025), explores the use of auxiliary lines in plane geometry, but is limited to simple cases and lacks engagement with the spatial complexity of solid geometry. Nonetheless, there remains a lack of dedicated resources for solid geometry, even though solving such problems often requires interpreting three-dimensional relationships and drawing auxiliary lines to uncover hidden spatial structures. While SolidGeo (Wang et al., 2025a) is a recent benchmark that focuses exclusively on solid geometry, it does not explicitly require auxiliary lines for solving its problems, leaving this important aspect of spatial reasoning underexplored. Similarly, other benchmarks such as MathVista (Lu et al., 2024), MathVision (Wang et al., 2024a), and MathVerse (Zhang et al., 2024) contain only a limited number of solid geometry problems, and these also do not require auxiliary lines to reach the solution. As a result, these resources fall short of evaluating a model’s ability to solve complex solid geometry problems where auxiliary lines are essential for uncovering implicit spatial relationships. To address this gap, we present AuxSolidMath, the first dedicated dataset for solid geometry problems that require auxiliary lines to solve. It offers comprehensive multimodal supervision, including the original diagram, the problem statement, textual descriptions of the required auxiliary lines, the final answer, and a corresponding diagram annotated with those lines, enabling models to learn how the auxiliary lines facilitate solid geometry reasoning.

## G PROMPTS

### G.1 PROMPTS FOR SUPERVISED FINE-TUNING

The following presents the two-part prompt template used in our supervised dataset. The system prompt assigns the solver role and enforces formatting: auxiliary lines must be wrapped in `[AUX]...[/AUX]` and the final answer must appear as plain text in `Final Answer:...`. The user prompt is multimodal, pairing a diagram referenced by the `<image>` token with the natural language question `{question}`, which yields explicit reasoning steps and a final answer.

#### SYSTEM\_PROMPT\_FOR\_SFT

```
SYSTEM_PROMPT_FOR_SFT = """
```

```
You are a mathematician skilled in solving geometry problems through step-by-step reasoning. Solve the given geometry problem based on a geometric diagram and a natural language question. Use '[AUX]...[/AUX]' to indicate auxiliary constructions, such as establishing coordinate systems or constructing auxiliary lines. Finally, provide your final answer within 'Final Answer:...'.
"""
```

**USER\_PROMPT\_FOR\_SFT**

```

USER_PROMPT_FOR_SFT = ""
Image: <image>
Question: {question}
""

```

**G.2 PROMPTS FOR CROSS-MODAL REWARD MODEL**

Using the prompt below, the cross-modal reward model compares the description of the auxiliary line generated by the policy model against a pair of diagrams, the original image  $I$  and its auxiliary-line counterpart  $I^+$ , and returns a single line justification and a calibrated score in  $[0, 1]$  that measures visual-textual agreement. The instruction emphasizes the correctness of auxiliary-line constructions and adherence to geometric constraints. Higher scores indicate stronger alignment.

**SYSTEM\_PROMPT\_FOR\_CROSS-MODAL\_REWARD\_MODEL**

```

SYSTEM_PROMPT_FOR_CROSS-MODAL_REWARD_MODEL = ""
You are a professional geometry reasoning evaluator. Your task is to evaluate whether a given textual
description of auxiliary lines accurately explains the visual difference between the original diagram and
the auxiliary-line diagram.

Score the description on a scale from 0 to 1:
1. 1 indicates a fully accurate and helpful description.
2. 0 indicates a completely irrelevant or misleading description.
3. Intermediate values (e.g., 0.25/ 0.50/ 0.75) reflect partial relevance or minor issues.

Return exactly one line:
<brief justification>. Score: <s>.
""

```

**USER\_PROMPT\_FOR\_CROSS-MODAL\_REWARD\_MODEL**

```

USER_PROMPT_FOR_CROSS-MODAL_REWARD_MODEL = ""
Image (original diagram): <image  $I$ >
Image (auxiliary-line diagram): <image  $I^+$ >
Auxiliary-line description: {generated_aux_description}
""

```

**H REPRESENTATIVE EXAMPLES**

As illustrated in Figure 6 present qualitative examples from the AuxSolidMath dataset, including the question, the final answer, the auxiliary-line description, the original diagram, and the auxiliary-line diagram. The examples showcase diverse strategies for constructing auxiliary lines and demonstrate that explicit annotations reveal the key spatial constraints.

**Question:** As shown in the diagram, consider the regular truncated quadrilateral pyramid  $ABCD - A_1B_1C_1D_1$ . Given that  $\angle B_1BA = 60^\circ$ ,  $AB = 2A_1B_1 = 4$ , and  $E$  is the midpoint of segment  $CD_1$ , determine the sine of the angle between line  $ED_1$  and plane  $ABB_1A_1$ .

**Final Answer:**  $\sqrt{6}/3$

**Auxiliary-line Description:** Connect  $A_1C_1$ , which intersects  $B_1D_1$  at  $O_1$ , then connect  $OO_1$ . Take  $O$  as the origin, and let the lines along  $OB$ ,  $OC$ , and  $OO_1$  be the x-axis, y-axis, and z-axis, respectively, then establish the three-dimensional Cartesian coordinate system  $O-xyz$ .

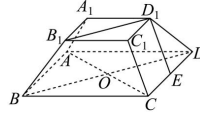

Original Diagram

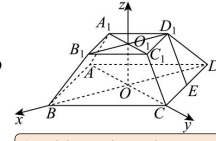

Auxiliary-line Diagram

**Question:** As shown in the diagram, consider the regular truncated quadrilateral pyramid  $ABCD - A_1B_1C_1D_1$ . The edge lengths of the upper and lower bases are 2 and 3, respectively, and the lateral edge length is  $\sqrt{2}$ . By extending  $AA_1$ ,  $BB_1$ ,  $CC_1$ ,  $DD_1$ , they intersect at point  $P$ . Determine the volume of the quadrilateral pyramid  $P - A_1B_1C_1D_1$ .

**Final Answer:**  $4\sqrt{6}/3$

**Auxiliary-line Description:** Through point  $P$ , construct  $PO$  perpendicular to the base  $ABCD$  at point  $O$ , intersecting the plane  $A_1B_1C_1D_1$  at point  $O_1$ . Through point  $B_1$ , construct  $B_1E$  perpendicular to the base  $ABCD$  at point  $E$ .

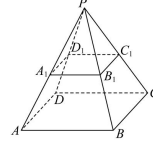

Original Diagram

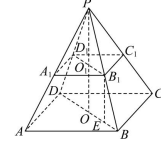

Auxiliary-line Diagram

**Question:** Given the geometric solid shown in the diagram, the base  $ABC$  is an equilateral triangle with a side length of 4. The lateral face  $AA_1C_1C$  is a square, and the plane  $AA_1C_1C$  is perpendicular to the plane  $ABC$ . Point  $D$  lies on edge  $CC_1$ , with  $CD = (1/4) * CC_1$ , and  $BB_1 = 3CD$ . Determine the sine of the angle between line  $B_1D$  and plane  $AA_1C_1C$ .

**Final Answer:**  $\sqrt{15}/5$

**Auxiliary-line Description:** Let  $M$  be the midpoint of  $AC$  and  $N$  be the midpoint of  $A_1C_1$ . Then connect  $MN$ ,  $BM$ , and  $NB_1$ . Through point  $B_1$ , construct  $B_1H$  perpendicular to  $MN$ , intersecting  $MN$  at point  $H$ , then connect  $DH$ .

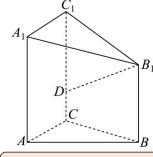

Original Diagram

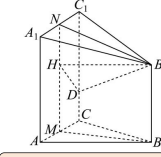

Auxiliary-line Diagram

**Question:** As shown in the diagram, consider the quadrilateral pyramid  $P - ABCD$ , where the base  $ABCD$  is a parallelogram. Points  $M$  and  $N$  are located on segments  $PC$  and  $PB$ , respectively. Given that  $PM:MC = 3:1$  and  $AN \parallel$  plane  $BDM$ , determine the ratio  $PN:NB$ .

**Final Answer:** 2

**Auxiliary-line Description:** Connect  $AC$ , which intersects  $BD$  at point  $O$ , connect  $CN$ , which intersects  $BM$  at point  $G$ , and then connect  $OG$ . Construct  $NH$  parallel to  $BM$ , intersecting  $PC$  at point  $H$ .

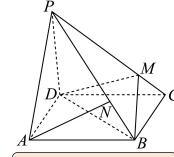

Original Diagram

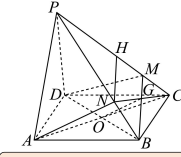

Auxiliary-line Diagram

**Question:** As shown in the diagram, in a pentahedron with vertices  $A, B, C, D, E, F$ , quadrilaterals  $ABCD$  and  $ADEF$  are both isosceles trapezoids. It is given that  $EF$  is parallel to  $AD$ ,  $BC$  is parallel to  $AD$ ,  $AD = 4$ ,  $AB = BC = EF = 2$ ,  $ED = \sqrt{10}$ ,  $FB = 2\sqrt{3}$ , and  $M$  is the midpoint of  $AD$ . Find the sine of the dihedral angle  $F-BM-E$ .

**Final Answer:**  $4\sqrt{3}/13$

**Auxiliary-line Description:** Draw  $BO$  perpendicular to  $AD$  intersecting  $AD$  at  $O$ , and connect  $OF$ . Take point  $O$  as the origin, and let the lines  $OB$ ,  $OD$ , and  $OF$  be the x-axis, y-axis, and z-axis, respectively, to establish the three-dimensional Cartesian coordinate system  $O-xyz$ .

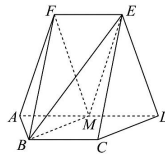

Original Diagram

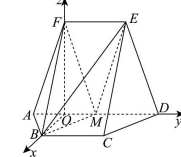

Auxiliary-line Diagram

Figure 6: Representative examples from the AuxSolidMath dataset.

## I CASE STUDY

### I.1 SUCCESSFUL CASES

In this section, we present representative cases produced by GeoVLMath-7B (see Figure 7). The examples illustrate how valid auxiliary-line constructions capture essential spatial constraints, which in turn lead to correct final answers. Collectively, these results provide concrete evidence of both the effectiveness of our training framework and the model’s capacity to tackle complex geometric reasoning requiring robust visual understanding and precise symbolic inference.

**Question:** As shown in the diagram, in the regular triangular prism  $ABC-A_1B_1C_1$ , the side length of the base is 2, and the lateral edge length is  $\sqrt{3}$ . D is the midpoint of AC. Find the volume of the triangular pyramid  $D-A_1C_1B_1$ .

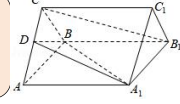

**Solution:** **[AUX]1. Construct auxiliary lines: Take the midpoint E of  $BC_1$ , and connect  $A_1E$  and  $D_1E$ .** Determine parallel lines: Since  $ABC-A_1B_1C_1$  is a regular triangular prism,  $AB \parallel C_1D_1$  and  $AB = C_1D_1$ . So quadrilateral  $ABC_1D_1$  is a parallelogram. Identify equal lengths: Given the side length of the base is 2 and the lateral edge length is  $\sqrt{3}$ , triangle  $C_1DC$  is equilateral with side length 2. Calculate the volume: Since  $ABC-A_1B_1C_1$  is a regular triangular prism and triangle  $ABC$  is equilateral with side length 2, the height of the pyramid from D to the plane  $A_1C_1B_1$  can be calculated as  $\sqrt{3}$ . The area of the triangular base  $A_1C_1B_1$  is  $(\sqrt{3}/4) * (2)^2 = \sqrt{3}$ . Therefore, the volume of the pyramid is  $(1/3) * \text{base area} * \text{height} = (1/3) * \sqrt{3} * \sqrt{3} = 1$ . **Final Answer: 1.**

**Question:** As shown in the diagram, in the quadrilateral pyramid  $S-ABCD$ ,  $SD$  is perpendicular to the plane  $ABCD$ . The base  $ABCD$  is a rhombus, with E and F being the midpoints of  $SB$  and  $AD$ , respectively. If  $\angle BAD = 60^\circ$ ,  $SD = 4$ , and  $AB = 2$ , find the volume of the triangular pyramid  $C-DEF$ .

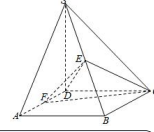

**Solution:** **[AUX]1. Construct auxiliary lines: Take the midpoint H of  $AB$ , and connect  $DH$ .** Since  $\angle BAD = 60^\circ$  and  $AB = AD = 2$ , triangle  $ABD$  is equilateral. Since H is the midpoint of  $AB$ ,  $AH = 1$ . By Pythagoras theorem in right triangle  $ADH$ ,  $DH = \sqrt{AD^2 - AH^2} = \sqrt{2^2 - 1^2} = \sqrt{3}$ . Since  $ABCD$  is a rhombus with  $AB = BC = CD = DA = 2$  and  $\angle ADC = 120^\circ$ , we can calculate  $DC$ . Using cosine rule in triangle  $ADC$ ,  $DC^2 = AD^2 + AC^2 - 2*AD*AC*\cos(120^\circ) = 2^2 + (2^2) - 2*2*2*\cos(\pi/3) = 4 + 4 - 4 = 1$ . So  $DC = 1$ . Triangle  $CDE$  has vertices: C, D, E. E is the midpoint of  $SB$ . Since S is the apex and  $SD \perp$  plane  $ABCD$ , plane  $SAB \perp$  plane  $ABCD$ . Therefore,  $DE \perp$  plane  $ABCD$ . Since CH lies in plane  $ABCD$ , we conclude  $DE \perp CH$ . Since  $AB = BC = CD = DA = 2$ , and H is the midpoint of  $AB$ ,  $AC \perp BH$ . Similarly, since  $CD \perp DA$  (because  $AD^2 + CD^2 = 2^2 + 1^2 = 5$ ,  $AC^2 = 2^2 - 1^2 = 3$ ) and  $DC = 1$ , we can deduce  $CH \perp CD$ . Thus  $CH \perp$  plane  $CDE$ . The area of triangle  $CDE$  is  $\text{Area}(CDE) = (1/2) * DC * DE = (1/2) * 1 * 2 = 1$ . The height of the pyramid  $C-DEF$  is  $CH$ . We need to find  $CH$ . In triangle  $CDB$ ,  $DB = 2\sqrt{2}$  (by Pythagoras theorem). So  $CH = AC \sin(60^\circ) = 2 * (\sqrt{3}/2) = \sqrt{3}$ . The volume of pyramid  $C-DEF$  is  $\text{Volume}(C-DEF) = (1/3) * \text{Area}(CDE) * CH = (1/3) * 1 * \sqrt{3} = \sqrt{3}/3$ . **Final Answer:  $\sqrt{3}/3$ .**

**Question:** As shown in the diagram, the diameter of the base of the cylinder is 3, and the slant height is 4.  $AB$  and  $CD$  are the diameters of the upper and lower bases of the cylinder, respectively, and  $AB \perp CD$ . Find the volume of the triangular pyramid  $A-BCD$ .

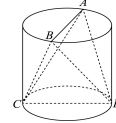

**Solution:** **[AUX]1. Construct auxiliary lines: Take the midpoint M of  $AB$ , and connect  $MD$  and  $MC$ .** Determine the base area of the triangular pyramid: Since  $AB \perp CD$  and  $AB = CD = 3$  (diameter), the area of the triangular base  $ABCD$  is given by  $\text{Area} = (1/2) * AB * CD = (1/2) * 3 * 3 = 4.5$ . Determine the height of the pyramid: The height of the triangular pyramid  $A-BCD$  is the perpendicular distance from A to the plane  $BDC$ . Given that  $AB \perp$  plane  $BDC$ , the height is  $AB$  itself, which is given as 4 (slant height). Calculate the volume of the triangular pyramid  $A-BCD$ :  $\text{Volume} = (1/3) * \text{Area of base} * \text{Height} = (1/3) * 4.5 * 4 = 6$ . **Final Answer: 6.**



**Question:** As shown in the diagram, the edge length of the cube  $ABCD - A_1B_1C_1D_1$  is 2. Find the sine of the angle between line  $BD$  and plane  $ACD_1$ .

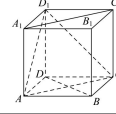

**Solution:** [AUX]1. Establish coordinate system: Take point  $D$  as the origin, and let the lines  $DA$ ,  $DC$ , and  $DD_1$  be the  $x$ -axis,  $y$ -axis, and  $z$ -axis, respectively, to establish the three-dimensional Cartesian coordinate system  $D-xyz$ . [AUX]n2. Determine coordinates of points: Since the edge length of the cube  $ABCD - A_1B_1C_1D_1$  is 2, we have the coordinates of the vertices as follows:  $D = (0, 0, 0)$ ,  $A = (2, 0, 0)$ ,  $C = (0, 2, 0)$ ,  $B = (2, 2, 0)$ ,  $D_1 = (0, 0, 2)$ ,  $A_1 = (2, 0, 2)$ ,  $C_1 = (0, 2, 2)$ ,  $B_1 = (2, 2, 2)$ . Find the coordinates of point  $E$ :  $E$  is the midpoint of  $BD$ . The coordinates of  $B$  are  $(2, 2, 0)$  and  $D$  are  $(0, 0, 0)$ . The midpoint  $E$  is the average of the coordinates of  $B$  and  $D$ :  $E = ((2+0)/2, (2+0)/2, (0+0)/2) = (1, 1, 0)$ . Find the vector  $BD$ : We have point  $B = (2, 2, 0)$  and point  $D = (0, 0, 0)$ . Vector  $BD = D - B = (0 - 2, 0 - 2, 0 - 0) = (-2, -2, 0)$ . Find a normal vector to the plane  $ACD_1$ : To find the normal vector, we need two vectors in the plane  $ACD_1$ . Vector  $AC = C - A = (0 - 2, 2 - 0, 0 - 0) = (-2, 2, 0)$ . Vector  $AD_1 = D_1 - A = (0 - 2, 0 - 0, 2 - 0) = (-2, 0, 2)$ . Normal vector  $n$  to the plane  $ACD_1$  is the cross product of  $AC$  and  $AD_1$ :  $n = AC \times AD_1 = (-2, 2, 0) \times (-2, 0, 2) = (2 \cdot 2 - 0 \cdot 0, 0 \cdot (-2) - (-2) \cdot 2, (-2) \cdot 0 - 2 \cdot (-2)) = (4, 4, 4)$ . We can take a simpler normal vector by dividing by 4, so we can take  $n = (1, 1, 1)$ . Calculate the sine of the angle between line  $BD$  and plane  $ACD_1$ : The sine of the angle  $\theta$  between line  $BD$  and plane  $ACD_1$  is given by the absolute value of the cosine of the angle between vector  $BD$  and normal vector  $n$ .  $\sin(\theta) = |\cos(\text{angle between } BD \text{ and } n)| = |(BD \cdot n) / (|BD| \cdot |n|)|$ .  $BD \cdot n = (-2, -2, 0) \cdot (1, 1, 1) = (-2)(1) + (-2)(1) + 0(1) = -2 - 2 + 0 = -4$ .  $|BD| = \sqrt{(-2)^2 + (-2)^2 + 0^2} = \sqrt{4 + 4} = \sqrt{8} = 2\sqrt{2}$ .  $|n| = \sqrt{1^2 + 1^2 + 1^2} = \sqrt{1 + 1 + 1} = \sqrt{3}$ .  $\sin(\theta) = |-4 / (2\sqrt{2} \cdot \sqrt{3})| = |-4 / (2\sqrt{6})| = |-2/\sqrt{6}| = 2/\sqrt{6} = 2\sqrt{6}/6 = \sqrt{6}/3$ . **Final Answer:**  $\sqrt{6}/3$ .

**Question:** As shown in the diagram, in the regular quadrilateral prism  $ABCD - A_1B_1C_1D_1$ ,  $M$  is the midpoint of  $AA_1$ ,  $AB = 2$ ,  $AA_1 = 4$ . Find the cosine value of the dihedral angle  $C_1 - BD - M$ .

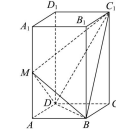

**Solution:** [AUX]1. Establish coordinate system: Take point  $D$  as the origin, and let the lines  $DA$ ,  $DC$ , and  $DD_1$  be the  $x$ -axis,  $y$ -axis, and  $z$ -axis, respectively, to establish the three-dimensional Cartesian coordinate system  $D-xyz$ . [AUX]n2. Determine coordinates of points: Since  $ABCD - A_1B_1C_1D_1$  is a regular quadrilateral prism with base side length  $AB = 2$  and height  $AA_1 = 4$ , we have the coordinates of the vertices as follows:  $D = (0, 0, 0)$ ,  $A = (2, 0, 0)$ ,  $C = (0, 2, 0)$ ,  $B = (2, 2, 0)$ ,  $D_1 = (0, 0, 4)$ ,  $C_1 = (0, 2, 4)$ ,  $A_1 = (2, 0, 4)$ ,  $B_1 = (2, 2, 4)$ .  $M$  is the midpoint of  $AA_1$ , so  $M = ((2+2)/2, (0+0)/2, (0+4)/2) = (2, 0, 2)$ . Find normal vectors of planes  $C_1BD$  and  $MBD$ : For plane  $C_1BD$ , we need two vectors in the plane:  $C_1D$  and  $C_1B$ . Vector  $C_1D = D - C_1 = (0, 0, 0) - (0, 2, 4) = (0, -2, -4)$ . Vector  $C_1B = B - C_1 = (2, 2, 0) - (0, 2, 4) = (2, 0, -4)$ . The normal vector  $n_1$  of plane  $C_1BD$  is the cross product of  $C_1D$  and  $C_1B$ :  $n_1 = C_1D \times C_1B = (0, -2, -4) \times (2, 0, -4) = ((-2)(-4) - (-4)(0), (-4)(2) - 0(-4), 0(0) - (-2)(2)) = (8, -8, 4)$ . We can take a simpler normal vector by dividing by 4, so  $n_1 = (2, -2, 1)$ . For plane  $MBD$ , we need two vectors in the plane:  $MB$  and  $MD$ . Vector  $MB = B - M = (2, 2, 0) - (2, 0, 2) = (0, 2, -2)$ . Vector  $MD = D - M = (0, 0, 0) - (2, 0, 2) = (-2, 0, -2)$ . The normal vector  $n_2$  of plane  $MBD$  is the cross product of  $MB$  and  $MD$ :  $n_2 = MB \times MD = (0, 2, -2) \times (-2, 0, -2) = (2(-2) - (-2)(0), (-2)(-2) - 0(-2), 0(0) - 2(-2)) = (-4, 4, 4)$ . We can take a simpler normal vector by dividing by 4, so  $n_2 = (-1, 1, 1)$ . Calculate the cosine of the dihedral angle: The cosine of the dihedral angle  $\theta$  is the cosine of the angle between the normal vectors  $n_1$  and  $n_2$ :  $\cos(\theta) = |(n_1 \cdot n_2) / (|n_1| \cdot |n_2|)|$ .  $n_1 \cdot n_2 = (2, -2, 1) \cdot (-1, 1, 1) = 2(-1) + (-2)(1) + 1(1) = -2 - 2 + 1 = -3$ .  $|n_1| = \sqrt{2^2 + (-2)^2 + 1^2} = \sqrt{4 + 4 + 1} = \sqrt{9} = 3$ .  $|n_2| = \sqrt{(-1)^2 + 1^2 + 1^2} = \sqrt{1 + 1 + 1} = \sqrt{3}$ .  $\cos(\theta) = |-3 / (3 \cdot \sqrt{3})| = |-3 / (3\sqrt{3})| = |-1/\sqrt{3}| = 1/\sqrt{3} = \sqrt{3}/3$ . **Final Answer:**  $\sqrt{3}/3$ .

**Question:** In the quadrilateral pyramid  $P-ABCD$ , the quadrilateral  $ABCD$  is a rhombus, with  $AC$  and  $BD$  intersecting at point  $O$ .  $PA = PC$ ,  $PB = PD$ ,  $\angle BAD = 60^\circ$ ,  $AB = 2$ , and  $M$  is the midpoint of segment  $PD$ . If the angle between line  $OM$  and plane  $ABCD$  is  $60^\circ$ , find the sine of the dihedral angle between plane  $PAD$  and plane  $PBC$ .

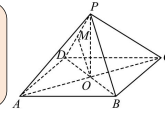

**Solution:** [AUX]1. Establish coordinate system: Take point  $O$  as the origin, and let the lines  $OA$ ,  $OB$ , and  $OP$  be the  $x$ -axis,  $y$ -axis, and  $z$ -axis, respectively, to establish the three-dimensional Cartesian coordinate system  $O-xyz$ . [AUX]n2. Determine coordinates of points: Since the rhombus  $ABCD$  has side length 2 and  $\angle BAD = 60^\circ$ , triangle  $ABD$  is equilateral, and triangle  $BCD$  is also equilateral. The diagonals  $AC$  and  $BD$  are perpendicular bisectors of each other. Given  $AB = 2$ , we have  $AO = OC = 1$  and  $BO = OD = \sqrt{2^2 - 1^2} = \sqrt{3}$ . Thus, the coordinates are:  $O = (0, 0, 0)$ ,  $A = (1, 0, 0)$ ,  $C = (-1, 0, 0)$ ,  $B = (0, \sqrt{3}, 0)$ ,  $D = (0, -\sqrt{3}, 0)$ . Since  $PA = PC$  and  $PB = PD$ ,  $P$  lies on the  $z$ -axis. Let  $P = (0, 0, k)$ . Squaring both  $PA$  and  $PC$  and equating them:  $(1-h)^2 + k^2 = (-1-h)^2 + k^2$ ,  $1 - 2h + h^2 + k^2 = 1 + 2h + h^2 + k^2$ ,  $-2h = 2h$ ,  $h = 0$ . Substituting  $h = 0$  into  $PA^2 = (1-0)^2 + (0-0)^2 + k^2 = 1 + k^2 = 1^2 = 1$ ,  $k^2 = 0$ ,  $k = 0$ . So  $z$  coordinate of  $P = OM = \sin(60^\circ) = \sqrt{3}/2$ .  $M$  is the midpoint of  $PD$ ,  $M = ((0+0)/2, (0+(-\sqrt{3})/2), (0+0)/2) = (0, -\sqrt{3}/2, 0)$ .  $P = (0, 0, \sqrt{3}/2)$ . Find normal vectors of plane  $PAD$  and plane  $PBC$ : For plane  $PAD$ , we need vectors  $PA$  and  $PD$ .  $PA = A - P = (1, 0, -\sqrt{3}/2)$ .  $PD = D - P = (0, -\sqrt{3}, -\sqrt{3}/2)$ . Normal vector  $n_1$  of plane  $PAD$  is the cross product of  $PA$  and  $PD$ :  $n_1 = PA \times PD = (1, 0, -\sqrt{3}/2) \times (0, -\sqrt{3}, -\sqrt{3}/2) = (-\sqrt{3}/2, \sqrt{3}, \sqrt{3})$ . For plane  $PBC$ , we need vectors  $PB$  and  $PC$ .  $PB = B - P = (0, \sqrt{3}, -\sqrt{3}/2)$ .  $PC = C - P = (-1, 0, -\sqrt{3}/2)$ . Normal vector  $n_2$  of plane  $PBC$  is the cross product of  $PB$  and  $PC$ :  $n_2 = PB \times PC = (0, \sqrt{3}, -\sqrt{3}/2) \times (-1, 0, -\sqrt{3}/2) = (-\sqrt{3}/2, \sqrt{3}, \sqrt{3})$ . Calculate the cosine of the dihedral angle: The cosine of the dihedral angle  $\theta$  is the cosine of the angle between the normal vectors  $n_1$  and  $n_2$ :  $\cos(\theta) = |(n_1 \cdot n_2) / (|n_1| \cdot |n_2|)|$ .  $n_1 \cdot n_2 = (-\sqrt{3}/2, \sqrt{3}, \sqrt{3}) \cdot (-\sqrt{3}/2, \sqrt{3}, \sqrt{3}) = (\sqrt{3}/2, 3, 3) = 9/2$ .  $|n_1| = \sqrt{(\sqrt{3}/2)^2 + 3^2 + 3^2} = \sqrt{3/4 + 9 + 9} = \sqrt{15}$ .  $|n_2| = \sqrt{(\sqrt{3}/2)^2 + 3^2 + 3^2} = \sqrt{3/4 + 9 + 9} = \sqrt{15}$ .  $\cos(\theta) = |9/2 / (\sqrt{15} \cdot \sqrt{15})| = |9/2 / 15| = 3/5$ . Calculate the sine of the dihedral angle:  $\sin^2(\theta) = 1 - \cos^2(\theta) = 1 - 9/25 = 16/25$ .  $\sin(\theta) = \sqrt{16/25} = 4/5$ . **Final Answer:**  $4/5$ .

Figure 7: Successful cases generated by GeoVLMath-7B.



## I.2 FAILURE CASES

In this section, we illustrate typical failure cases generated by GeoVLMath-7B (see Figure 8). The observed failures are exemplified by mis-specified coordinate systems and auxiliary-line descriptions that are irrelevant to the diagram, both of which fail to capture essential spatial constraints and may yield incorrect final answers. To mitigate such errors, we will explore diffusion-based drawing modules that render auxiliary lines directly on the original diagram and support iterative correction as part of future work.

**Question:** As shown in the diagram, in the quadrilateral pyramid P-ABCD, the base ABCD is a square, PAD is an equilateral triangle, and PC = AC. Find the sine of the angle between line PB and plane PCD.

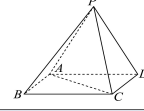

**Ground Truth:**  $\sqrt{6}/4$

**Analysis:** The A-xyz coordinate system is incorrectly established—AP is not orthogonal to AB or AD, violating the pairwise orthogonality required for a three-dimensional Cartesian system. Consequently, the coordinates assigned to points and lines are invalid, leading to an incorrect final answer.

**Solution:** [AUX]1. Establish coordinate system: Take point A as the origin, and let the lines AB, AD, and AP be the x-axis, y-axis, and z-axis, respectively, to establish the three-dimensional Cartesian coordinate system A-xyz. [AUX]2. Determine the coordinates of the vertices: Let the side length of the square ABCD be 2. Since A is the origin,  $A = (0, 0, 0)$ . As AB is along the x-axis and B is to the right of A with length 2,  $B = (2, 0, 0)$ . As AD is along the y-axis and D is above A with length 2,  $D = (0, 2, 0)$ . Since ABCD is a square,  $C = (2, 2, 0)$ . As PA is a line from A in the z-direction upwards and triangle PAD is an equilateral triangle with side length 2, the height from P to the base ABCD must be  $\sqrt{2^2 - 1^2} = \sqrt{3}$ . So,  $P = (0, 0, \sqrt{3})$ . Find the vector PB: We have  $P = (0, 0, \sqrt{3})$  and  $B = (2, 0, 0)$ . The vector  $PB = B - P = (2, 0, 0) - (0, 0, \sqrt{3}) = (2, 0, -\sqrt{3})$ . Find the normal vector of the plane PCD: We need two vectors in the plane PCD, for example, vector PC and vector PD. Vector  $PC = C - P = (2, 2, 0) - (0, 0, \sqrt{3}) = (2, 2, -\sqrt{3})$ . Vector  $PD = D - P = (0, 2, 0) - (0, 0, \sqrt{3}) = (0, 2, -\sqrt{3})$ . The normal vector  $n$  of the plane PCD is the cross product of PC and PD:  $n = PC \times PD = (2, 2, -\sqrt{3}) \times (0, 2, -\sqrt{3}) = (2 \cdot (-\sqrt{3}) - (-\sqrt{3}) \cdot 2, (-\sqrt{3}) \cdot 0 - 2 \cdot (-\sqrt{3}), 2 \cdot 2 - 2 \cdot 0) = (-2\sqrt{3} + 2\sqrt{3}, 2\sqrt{3}, 4 - 0) = (0, 2\sqrt{3}, 4)$ . To take a simpler normal vector, we can use  $n' = (0, \sqrt{3}, 2)$ . Calculate the sine of the angle between line PB and plane PCD: The sine of the angle  $\theta$  between line PB and plane PCD is given by the absolute value of the cosine of the angle between vector PB and normal vector  $n'$ :  $\sin(\theta) = |\cos(\text{angle between PB and } n')| = |(PB \cdot n') / (|PB| \cdot |n'|)|$ .  $PB \cdot n' = (2, 0, -\sqrt{3}) \cdot (0, \sqrt{3}, 2) = 2 \cdot 0 + 0 \cdot \sqrt{3} + (-\sqrt{3}) \cdot 2 = -2\sqrt{3}$ .  $|PB| = \sqrt{2^2 + 0^2 + (-\sqrt{3})^2} = \sqrt{4 + 0 + 3} = \sqrt{7}$ .  $|n'| = \sqrt{0^2 + (\sqrt{3})^2 + 2^2} = \sqrt{0 + 3 + 4} = \sqrt{7}$ .  $\sin(\theta) = |-2\sqrt{3} / (\sqrt{7} \cdot \sqrt{7})| = |-2\sqrt{3} / 7| = 2\sqrt{3} / 7$ . **Final Answer:**  $2\sqrt{3}/7$ .

**Question:** As shown in the diagram, the given solid consists of half of a cone and a triangular pyramid. The base of the cone is a circle with center O and radius 1, and the height of the cone satisfies  $PO = 2$ . The triangular pyramid P-ABC has its base ABC as an isosceles right triangle, where AB is the hypotenuse and coincides with the diameter of the cone's base circle. The base ABC lies on the same plane as the cone's base. Determine the angle between line PC and plane ABC.

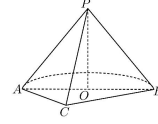

**Ground Truth:**  $\arctan 2$

**Analysis:** The generated auxiliary-line description leaves the geometric configuration unchanged. Consequently, the subsequent reasoning proceeds from a spurious auxiliary premise rather than from added geometric constraints, leading to an incorrect final answer.

**Solution:** [AUX]1. Construct auxiliary lines: Take the midpoint M of AB, and connect OM. [AUX]2. Identify perpendicularity: Since O is the center of the circle,  $OM \perp AB$ . Also,  $PO \perp OM$  because PO is the height of the cone and O is on the base circle. Since  $AB \cap PO = O$ , and AB and PO are in plane PAB, we conclude  $OM \perp$  plane PAB. Determine angle: The angle between line PC and plane ABC is the angle between line PC and its projection onto plane ABC. Since  $OM \perp$  plane PAB, the projection of point P onto plane ABC lies on line OM. The projection of line PC onto plane ABC is segment AC. Calculate angle: To find the angle between line PC and plane ABC, we need to find the sine of the angle. Given  $PO = 2$  and  $OA = 1$ , we have  $AC = \sqrt{PA^2 - AO^2} = \sqrt{2^2 - 1^2} = \sqrt{3}$ . **Final Answer:**  $\arcsin(\sqrt{3}/3)$ .

Figure 8: Failure cases generated by GeoVLMath-7B.
